# Supplementary material for: Field Emission Properties of Cu-Filled Vertically Aligned Carbon Nanotubes Grown Directly on Thin Cu Foils
Source: MDPI journal article supplement (doi:10.3390/nano14110988), 2024-06-06
Supplement: s1 [file nanomaterials-3030763-supplementary.pdf › nanomaterials-3030763-supplementary.pdf]

## Supplementary Materials:

### Field Emission Properties of Cu-Filled VACNTs Grown Directly on Thin Cu-Foils

Chinaza E. Nwanno <sup>1</sup>, Arun Thapa <sup>1</sup>, John Watt <sup>2</sup>, Daniel Simkins Bendayan <sup>1</sup> and Wenzhi Li <sup>1,\*</sup>

<sup>1</sup> Department of Physics, Florida International University, Miami, FL 33199, USA

<sup>2</sup> Center for Integrated Nanotechnologies, Los Alamos National Laboratory,  
Los Alamos, NM 87545, USA

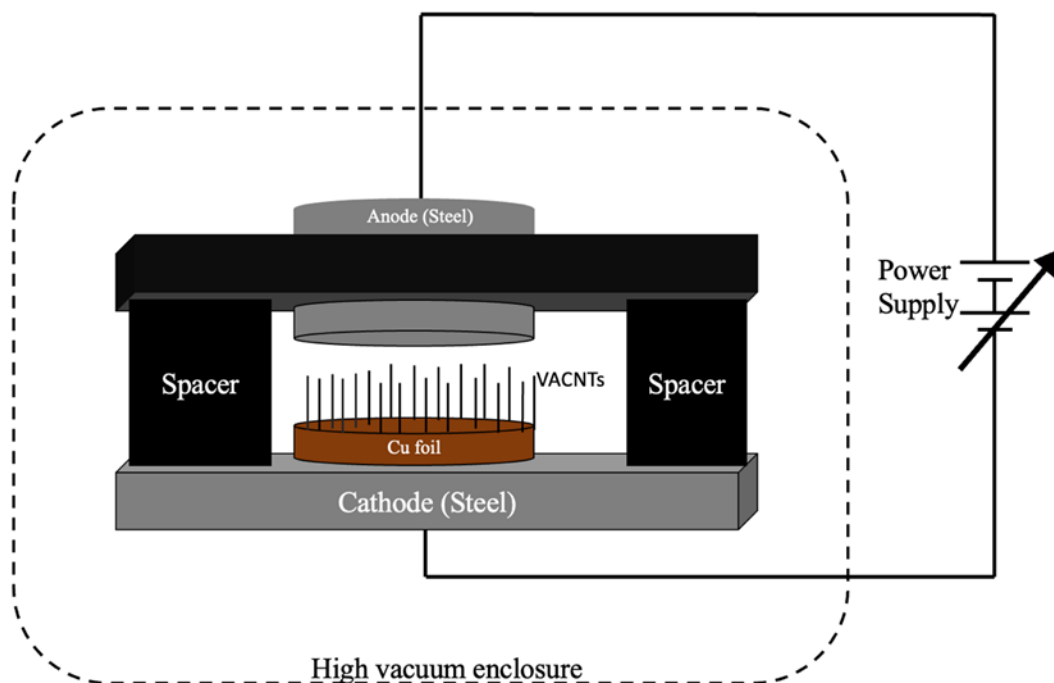

**Figure S1.** Schematic illustration of the setup for field emission measurements.
